# Supplementary material
Source: publisher figshare collection journal article supplement (https://frontiersin.figshare.com/ndownloader/files/22817822)
Supplement: Supplementary file 1 [file 22817822]

**Table S1** Putative mycorrhizal OTUs associated with the cooccurring *Dendrobium* species growing in the traditional tea garden.

| GenBank accession number | OTU Identity based on closest GenBank match (OTU-No.-Phylum – Family) | Total Sequences | Host *Dendrobium* species# |
| --- | --- | --- | --- |
| MT134828 | OTU2788-Ceratobasidiaceae | 9442 | 4, 5, 6, 7, 8, 9 |
| MT134829 | OTU2859-Ceratobasidiaceae | 7823 | 4, 5, 6, 7, 8, 9 |
| MT134830 | OTU2489-Ceratobasidiaceae | 782 | 2,3,6,7 |
| MT134831 | OTU2865-Ceratobasidiaceae | 885 | 1,7,8 |
| MT134832 | OTU2247-Ceratobasidiaceae | 689 | 2 |
| MT134833 | OTU2388-Ceratobasidiaceae | 6 | 6 |
| MT134834 | OTU2940-Ceratobasidiaceae | 4521 | 3, 6 |
| MT134835 | OTU3010-Ceratobasidiaceae | 263 | 6, 7 |
| MT134836 | OTU3049-Ceratobasidiaceae | 8 | 6 |
| MT134837 | OTU2936-Ceratobasidiaceae | 9 | 5 |
| MT134838 | OTU2681-Ceratobasidiaceae | 6721 | 1,2,3,5,6,7,8,9 |
| MT134839 | OTU2029-Ceratobasidiaceae | 4924 | 4,6 |
| MT134840 | OTU2656-Ceratobasidiaceae | 6340 | 4,5,6,8 |
| MT134841 | OTU2331-Ceratobasidiaceae | 2523 | 3,4,6 |
| MT134842 | OTU2425-Ceratobasidiaceae | 4 | 6 |
| MT134843 | OTU2169-Ceratobasidiaceae | 362 | 6 |
| MT134844 | OTU576-Tulasnellaceae | 7 | 5 |
| MT134845 | OTU3783-Tulasnellaceae | 6949 | 4,5,6,7,8,9 |
| MT134846 | OTU5079-Tulasnellaceae | 271 | 8 |
| MT134847 | OTU118-Tulasnellaceae | 5880 | 1 |
| MT134848 | OTU329-Tulasnellaceae | 57 | 6,9 |
| MT134849 | OTU3948-Sebacinaceae | 6 | 6 |
| MT134850 | OTU5626-Sebacinaceae | 762 | 5 |
| MT134851 | OTU3692-Sebacinaceae | 341 | 5 |
| MT134852 | OTU5499-Sebacinaceae | 377 | 1 |
| MT134853 | OTU5553-Sebacinaceae | 4 | 4 |
| MT134854 | OTU5385-Sebacinaceae | 2731 | 5,6,7,8 |
| MT134855 | OTU5115-Sebacinaceae | 867 | 6,8 |
| MT134856 | OTU5289-Sebacinaceae | 27 | 2 |
| MT134857 | OTU5337-Sebacinaceae | 1571 | 5,8,9 |
| MT134858 | OTU5373-Sebacinaceae | 79 | 6,8 |
| MT134859 | OTU5290-Sebacinaceae | 3 | 2 |
| MT134860 | OTU6825-Sebacinaceae | 1125 | 1,3 |
| MT134861 | OTU6656-Sebacinaceae | 1409 | 1,2,3 |
| MT134863 | OTU5165-Serendipitaceae | 1165 | 3,4,8 |
| MT134864 | OTU4150-Serendipitaceae | 3 | 5 |
| MT134865 | OTU2516-Serendipitaceae | 24022 | 3,4,5,6,7,8,9 |
| MT134866 | OTU4868-Serendipitaceae | 89 | 3,4,6,7 |
| MT134867 | OTU4178-Serendipitaceae | 20 | 5 |
| MT134868 | OTU3874-Serendipitaceae | 11 | 4,5 |
| MT134869 | OTU3968-Serendipitaceae | 14 | 5,9 |
| MT134870 | OTU4240-Serendipitaceae | 3 | 8 |
| MT134871 | OTU5135-Serendipitaceae | 17 | 6,7 |
| MT134872 | OTU4405-Serendipitaceae | 29882 | 4,5,6,7,8,9 |
| MT134873 | OTU3992-Serendipitaceae | 273 | 4,6,8 |
| MT134874 | OTU4248-Serendipitaceae | 77 | 4,5,9 |
| MT134875 | OTU4919-Serendipitaceae | 201 | 5,6,7,9 |
| MT134876 | OTU5291-Serendipitaceae | 908 | 2,4 |
| MT134877 | OTU1136-Serendipitaceae | 98 | 5 |
| MT134878 | OTU5010-Serendipitaceae | 20 | 3 |
| MT134879 | OTU3426-Serendipitaceae | 36 | 3 |
| MT134880 | OTU4383-Serendipitaceae | 28 | 4,6,8 |
| MT134881 | OTU4444-Serendipitaceae | 83 | 5 |
| MT134882 | OTU3512-Serendipitaceae | 38974 | 2,3 |
| MT134883 | OTU4049-Serendipitaceae | 55549 | 1,3,4,5,6,7,8,9 |
| MT134884 | OTU4899-Serendipitaceae | 14194 | 3,4,5,6,7,8,9 |
| MT134885 | OTU4024-Serendipitaceae | 6484 | 4,5,6,7,8,9 |
| MT134886 | OTU3969-Serendipitaceae | 282 | 2,3,4,5,7,8 |
| MT134887 | OTU3612-Serendipitaceae | 522 | 3,4,5,6 |
| MT134888 | OTU4036-Serendipitaceae | 315 | 5,6 |
| MT134889 | OTU4476-Serendipitaceae | 74 | 3,5,6,8,9 |
| MT134890 | OTU3853-Serendipitaceae | 53 | 3,5,7,9 |
| MT134891 | OTU4074-Serendipitaceae | 33 | 1 |
| MT134892 | OTU4098-Serendipitaceae | 25 | 4,9 |
| MT134893 | OTU4460-Serendipitaceae | 12 | 5 |
| MT134894 | OTU5162-Serendipitaceae | 10 | 8,9 |
| MT134895 | OTU4147-Serendipitaceae | 9 | 5 |
| MT134896 | OTU4287-Serendipitaceae | 10 | 4,9 |
| MT134897 | OTU3344-Serendipitaceae | 9 | 3,9 |
| MT134898 | OTU4637-Serendipitaceae | 8 | 5 |
| MT134899 | OTU3755-Serendipitaceae | 3 | 2 |
| MT134900 | OTU4004-Serendipitaceae | 7 | 3 |
| MT134901 | OTU4197-Serendipitaceae | 7 | 5,6 |
| MT134902 | OTU4263-Serendipitaceae | 5 | 9 |
| MT134903 | OTU4484-Serendipitaceae | 3 | 2 |
| MT134904 | OTU5043-Serendipitaceae | 9 | 8 |
| MT134905 | OTU4976-Serendipitaceae | 40730 | 3,7,9 |
| MT134906 | OTU4840-Serendipitaceae | 29147 | 3,4,5,6,7,8,9 |
| MT134907 | OTU4711-Serendipitaceae | 19919 | 4,5,6,7,8,9 |
| MT134908 | OTU5485-Serendipitaceae | 2689 | 4,5,6,7,8,9 |
| MT134909 | OTU3979-Serendipitaceae | 2393 | 1,3,4,5,6,7,8,9 |
| MT134910 | OTU4286-Serendipitaceae | 2822 | 5,6,7 |
| MT134911 | OTU4687-Serendipitaceae | 1951 | 1,2,3,4,5,6,7 |
| MT134912 | OTU4398-Serendipitaceae | 1320 | 2,3,4,5,6,7,8,9 |
| MT134913 | OTU4311-Serendipitaceae | 117 | 3,5,7,9 |
| MT134914 | OTU5372-Serendipitaceae | 209 | 1,2 |
| MT134915 | OTU4701-Serendipitaceae | 109 | 3,6,8,9 |
| MT134916 | OTU3667-Serendipitaceae | 249 | 3,5,6,9 |
| MT134917 | OTU3965-Serendipitaceae | 124 | 1 |
| MT134918 | OTU4854-Serendipitaceae | 76 | 1,2 |
| MT134919 | OTU5591-Serendipitaceae | 105 | 3,6 |
| MT134920 | OTU4873-Serendipitaceae | 71 | 6,7,9 |
| MT134921 | OTU4373-Serendipitaceae | 111 | 1,2,5 |
| MT134922 | OTU5379-Serendipitaceae | 44 | 4,5,6,7,8,9 |
| MT134923 | OTU5102-Serendipitaceae | 102 | 5,6,9 |
| MT134924 | OTU4803-Serendipitaceae | 32 | 6,7 |
| MT134925 | OTU4961-Serendipitaceae | 85 | 9 |
| MT134926 | OTU5042-Serendipitaceae | 14 | 6,7,8,9 |
| MT134927 | OTU4284-Serendipitaceae | 12 | 7,9 |
| MT134928 | OTU4851-Serendipitaceae | 21 | 9 |
| MT134929 | OTU4992-Serendipitaceae | 9 | 7,8 |

# Host Dendrobium species: 1. *D. gratiosissimum*；2. *D. thyrsiflorum*; 3. *D. aphyllum*；4. *D. cariniferum*；5. *D. brymerianum*；6. *D. jenkinsii*；7. *D. capillipes*；8. *D. devonianum*；9. *D. sinominutiflorum*
